# Supplementary material for: Bronchiolitis obliterans syndrome after lung or haematopoietic stem cell transplantation: current management and future directions
Source: PubMed Central journal article supplement — ERJ Open Res. 2022 Jul 25;8(3):00185-2022. doi: 10.1183/23120541.00185-2022 (PMC9309343; doi:10.1183/23120541.00185-2022), 2022-07-25
Supplement: 00185-2022.SUPPLEMENT.pdf [file 00185-2022.SUPPLEMENT.pdf]

## Supplementary Materials

**SUPPLEMENTARY TABLE S1** Phenotypes of chronic lung allograft dysfunction [1]

|                                          | <b>BOS</b> | <b>RAS</b> | <b>Mixed<sup>a</sup></b> | <b>Undefined<sup>b</sup></b> |      |
|------------------------------------------|------------|------------|--------------------------|------------------------------|------|
| Obstruction (FEV <sub>1</sub> /FVC <0.7) | ✓          | X          | ✓                        | ✓                            | ✓    |
| Restriction (≥10% ↓ in TLC)              | X          | ✓          | ✓                        | X                            | OR ✓ |
| CT opacities <sup>c</sup>                | X          | ✓          | ✓                        | ✓                            | X    |

<sup>a</sup>By definition, all cases that transition from a BOS to a RAS phenotype and vice versa will meet these criteria.

<sup>b</sup>Undefined means definite CLAD but with two possible combinations of variables making it difficult to categorise as one of the other phenotypes.

<sup>c</sup>Parenchymal opacities and/or pleural thickening consistent with a diagnosis of pulmonary and/or pleural fibrosis.

BOS: bronchiolitis obliterans syndrome; CLAD: chronic lung allograft dysfunction; CT: computed tomography; FEV<sub>1</sub>: forced expiratory volume in 1 second; FVC: forced vital capacity; RAS: restrictive allograft syndrome; TLC: total lung capacity.

**SUPPLEMENTARY TABLE S2** Other conditions/scenarios affecting pulmonary function in lung transplant or haematopoietic stem cell transplant (HSCT) recipients that need to be excluded during the diagnostic work-up of patients with suspected chronic lung allograft dysfunction or graft-versus-host-disease bronchiolitis obliterans syndrome

| Lung transplantation [1]                                                                                                                                                                                                                                                                                                                                                                                                                                                                                                                                                                                                                                                                                                                                                  | HSCT [2]                                                                                                                                                                                                                                                                                                                                                                                                |
|---------------------------------------------------------------------------------------------------------------------------------------------------------------------------------------------------------------------------------------------------------------------------------------------------------------------------------------------------------------------------------------------------------------------------------------------------------------------------------------------------------------------------------------------------------------------------------------------------------------------------------------------------------------------------------------------------------------------------------------------------------------------------|---------------------------------------------------------------------------------------------------------------------------------------------------------------------------------------------------------------------------------------------------------------------------------------------------------------------------------------------------------------------------------------------------------|
| <p><b>A. Conditions in which it may be valid to recalculate/rest FEV<sub>1</sub> reference value</b></p> <ul style="list-style-type: none"> <li>• Decreasing lung due to normal aging process</li> <li>• Surgical factors (e.g. transplant lung resection, chest wall surgery, phrenic nerve damage)</li> <li>• Mechanical factors (e.g. persistent pleural effusion, persistent lung oedema due to significant kidney/heart/liver failure, airway stenosis, myopathy/neuropathy/Parkinson’s disease, weight gain, native lung hyperinflation after single-lung transplant)</li> <li>• Localised infection with chronic scarring (e.g. abscess/empyema/mycetoma)</li> </ul> <p><b>B. Factors that cannot be differentiated easily from CLAD and do not ever allow</b></p> | <ul style="list-style-type: none"> <li>• Infection</li> <li>• Idiopathic pneumonia syndrome</li> <li>• Cryptogenic-organising pneumonia</li> <li>• Pulmonary fibrosis</li> <li>• Late radiation effects</li> <li>• Asthma</li> <li>• Chronic obstructive pulmonary disease</li> <li>• Tracheomegaly</li> <li>• Tracheobronchomalacia</li> <li>• <math>\alpha_1</math>-antitrypsin deficiency</li> </ul> |

---

**recalculation/resetting of the FEV<sub>1</sub> reference value**

- Any from (A) above where there is not stability for ≥6 months
  - Infiltration with tumour
  - Infiltration of the allograft with proven disease recurrence from the underlying transplant indication (e.g. LAM, sarcoidosis)
  - Drug or other induced pulmonary toxicity (e.g. sirolimus, methotrexate, amiodarone, radiotherapy)
  - Pulmonary arterial strictures or emboli
  - Acute/subacute generalised infection
  - Acute/subacute cellular or antibody-mediated rejection
  - Acute/subacute effects of aspiration
- C. Failing to reach normal predicted lung function (i.e. low FEV<sub>1</sub> reference value such that FEV<sub>1</sub> is ≤80% of the recipient predicted value)**
- May include an age difference between donor and recipient where older donor
-

|                                                                                                   |  |
|---------------------------------------------------------------------------------------------------|--|
| lungs are implanted or when an intra-operative allograft reduction surgery/lobectomy is performed |  |
|---------------------------------------------------------------------------------------------------|--|

FEV<sub>1</sub>: forced expiratory volume in 1 second; HSCT: haematopoietic stem cell transplant; LAM: lymphangioleiomyomatosis.

## References

- 1 Verleden GM, Glanville AR, Lease ED, et al. Chronic lung allograft dysfunction: Definition, diagnostic criteria, and approaches to treatment - a consensus report from the Pulmonary Council of the ISHLT. *J Heart Lung Transplant* 2019; 38: 493-503.
- 2 Williams KM. How I treat bronchiolitis obliterans syndrome after hematopoietic stem cell transplantation. *Blood* 2017; 129: 448-455.
